# Supplementary material for: Multiple Monitoring Stations in Big Cities: First Example of Three Spore Traps in Rome
Source: MDPI journal article supplement (doi:10.3390/su15054155), 2023-02-24
Supplement: s1 [file s1]

**Table S2.** Pearson's correlation in statistically significant comparing phenological and production indicators of taxa considered in 3 sampling sites. (\* = Correlation at 0.05 level 2 tailed and \*\* = Correlation at 0.01 level 2 tailed).

| Correlations                                    |                        |       |        |        |        |        |        |
|-------------------------------------------------|------------------------|-------|--------|--------|--------|--------|--------|
| TV 2020 SP 2020 CP 2020 TV 2021 SP 2021 CP 2021 |                        |       |        |        |        |        |        |
|                                                 | Pearson Correlation    | 1     | ,703** | ,600** | ,979** | ,927** | ,459** |
| TV 2020                                         | Significance(2-tailed) | 0,000 | ,000   | ,000   | ,000   | ,000   | ,001   |
|                                                 | N                      | 48    | 48     | 48     | 48     | 48     | 48     |
|                                                 | Pearson Correlation    |       | 1      | ,741** | ,702** | ,886** | ,557** |
| SP 2020                                         | Significance(2-tailed) |       | 0,000  | ,000   | ,000   | ,000   | ,000   |
|                                                 | N                      |       | 48     | 48     | 48     | 48     | 48     |
|                                                 | Pearson Correlation    |       |        | 1      | ,607** | ,728** | ,966** |
| CP 2020                                         | Significance(2-tailed) |       |        | 0,000  | ,000   | ,000   | ,000   |
|                                                 | N                      |       |        | 48     | 48     | 48     | 48     |
|                                                 | Pearson Correlation    |       |        |        | 1      | ,942** | ,481** |
| TV 2021                                         | Significance(2-tailed) |       |        |        | 0,000  | ,000   | ,001   |
|                                                 | N                      |       |        |        | 48     | 48     | 48     |
|                                                 | Pearson Correlation    |       |        |        |        | 1      | ,571** |
| SP 2021                                         | Significance(2-tailed) |       |        |        |        | 0,000  | ,000   |
|                                                 | N                      |       |        |        |        | 48     | 48     |
|                                                 | Pearson Correlation    |       |        |        |        |        | 1      |
| CP 2021                                         | Significance(2-tailed) |       |        |        |        |        | 0,000  |
|                                                 | N                      |       |        |        |        |        | 48     |
| **. Correlation at 0.01                         |                        |       |        |        |        |        |        |
| *. Correlation at 0.05                          |                        |       |        |        |        |        |        |

**Table S3.** Pearson's correlation between pollen season parameters, sites and taxa. (\* = Correlation at 0.05 level 2 tailed and \*\* = Correlation at 0.01 level 2 tailed).

| Correlations |                            |       |       |       |       |               |               |        |               |               |
|--------------|----------------------------|-------|-------|-------|-------|---------------|---------------|--------|---------------|---------------|
|              |                            | site  | taxon | year  | start | end           | length        | APIn   | peak<br>MAX   | peak<br>DAY   |
|              | Pearson<br>Correlation     | 1     | 0,000 | 0,000 | ,012  | ,028          | ,023          | -,007  | ,074          | -,030         |
| Site         | Significance(<br>2-tailed) | 0,000 | 1,000 | 1,000 | ,937  | ,850          | ,878          | ,962   | ,616          | ,837          |
|              | N                          | 48    | 48    | 48    | 48    | 48            | 48            | 48     | 48            | 48            |
|              | Pearson<br>Correlation     |       | 1     | 0,000 | ,232  | <b>,449**</b> | <b>,316*</b>  | ,020   | -,080         | <b>,298*</b>  |
| Taxon        | Significance(<br>2-tailed) |       | 0,000 | 1,000 | ,112  | <b>,001</b>   | <b>,029</b>   | ,892   | ,588          | <b>,039</b>   |
|              | N                          |       | 48    | 48    | 48    | <b>48</b>     | <b>48</b>     | 48     | 48            | <b>48</b>     |
|              | Pearson<br>Correlation     |       |       | 1     | ,035  | ,123          | ,116          | -0,312 | -,215         | ,037          |
| year         | Significance(<br>2-tailed) |       |       | 0,000 | ,811  | ,406          | ,434          | ,051   | ,142          | ,805          |
|              | N                          |       |       | 48    | 48    | 48            | 48            | 48     | 48            | 48            |
|              | Pearson<br>Correlation     |       |       |       | 1     | <b>,633**</b> | -,258         | -0,355 | -,278         | <b>,887**</b> |
| start        | Significance(<br>2-tailed) |       |       |       | 0,000 | <b>,000</b>   | ,077          | ,063   | ,056          | <b>,000</b>   |
|              | N                          |       |       |       | 48    | <b>48</b>     | 48            | 48     | 48            | <b>48</b>     |
|              | Pearson<br>Correlation     |       |       |       |       | 1             | <b>,585**</b> | -,198  | -0,317        | <b>,712**</b> |
| end          | Significance(<br>2-tailed) |       |       |       |       | 0,000         | <b>,000</b>   | ,177   | ,078          | <b>,000</b>   |
|              | N                          |       |       |       |       | 48            | <b>48</b>     | 48     | 48            | <b>48</b>     |
|              | Pearson<br>Correlation     |       |       |       |       |               | 1             | ,126   | -,104         | -,040         |
| length       | Significance(<br>2-tailed) |       |       |       |       |               | 0,000         | ,395   | ,481          | ,785          |
|              | N                          |       |       |       |       |               | 48            | 48     | 48            | 48            |
|              | Pearson<br>Correlation     |       |       |       |       |               |               | 1      | <b>,925**</b> | -0,344        |
| APIn         | Significance(<br>2-tailed) |       |       |       |       |               |               | 0,000  | <b>,000</b>   | ,087          |

|                         |               |       |           |        |
|-------------------------|---------------|-------|-----------|--------|
|                         | N             | 48    | <b>48</b> | 48     |
|                         | Pearson       |       |           |        |
|                         | Correlation   |       | 1         | -0,313 |
| peak                    | Significance( |       |           |        |
| MAX                     | 2-tailed)     | 0,000 |           | ,061   |
|                         | N             | 48    | 48        |        |
|                         | Pearson       |       |           |        |
|                         | Correlation   |       |           | 1      |
| peakD                   | Significance( |       |           |        |
| AY                      | 2-tailed)     |       | 0,000     |        |
|                         | N             |       |           | 48     |
| <hr/>                   |               |       |           |        |
| **. Correlation at 0.01 |               |       |           |        |
| *. Correlation at 0.05  |               |       |           |        |
| <hr/>                   |               |       |           |        |
